# Supplementary material for: Significant prognostic value of circulating tumor cells in esophageal cancer patients: A meta-analysis
Source: PubMed Central journal article supplement (PMC5362525; doi:10.18632/oncotarget.15012), 2017-02-02
Supplement: oncotarget-08-15815-s001.pdf [file oncotarget-08-15815-s001.pdf]

## Significant prognostic value of circulating tumor cells in esophageal cancer patients: A meta-analysis

### SUPPLEMENTARY TABLE

Supplementary Table 1: The detailed exclusion criteria about the 19 excluded full-text articles

| Author, year             | Paper titles                                                                                                                                                                           | Exclusion criteria                                | References |
|--------------------------|----------------------------------------------------------------------------------------------------------------------------------------------------------------------------------------|---------------------------------------------------|------------|
| Li H et al, 2015         | Circulating Tumor Cell Analyses in Patients With Esophageal Squamous Cell Carcinoma Using Epithelial Marker-Dependent and -Independent Approaches                                      | No prognostic information                         | [11]       |
| Ikoma D et al, 2007      | Circulating tumor cells and aberrant methylation as tumor markers in patients with esophageal cancer                                                                                   | No prognostic information                         | [12]       |
| Zhan XK et al, 2008      | Clinical analysis of 81 cases with primary small cell carcinoma of the esophagus.                                                                                                      | Not involved in circulating tumor cells           | [13]       |
| Zhang Y et al, 2011      | Expression and clinical significance of PI3K in esophageal squamous cell carcinoma                                                                                                     | PI3K is not the marker of circulating tumor cell  | [14]       |
| Matsuda S et al, 2014    | Clinical significance of plasma fibrinogen level as a predictive marker for postoperative recurrence of esophageal squamous cell carcinoma in patients receiving neoadjuvant treatment | Not involved in circulating tumor cells           | [15]       |
| Koike M et al, 2002      | Molecular detection of circulating esophageal squamous cell cancer cells in the peripheral blood                                                                                       | without survival data to estimate HRs and 95% CIs | [16]       |
| Hashimoto T et al, 2008  | Circulating micrometastases of esophageal cancer detected by carcinoembryonic antigen mRNA reverse transcriptase-polymerase chain reaction: clinical implications                      | without survival data to estimate HRs and 95% CIs | [17]       |
| Kaganoi J et al, 2004    | Detection of circulating oesophageal squamous cancer cells in peripheral blood and its impact on prognosis                                                                             | without survival data to estimate HRs and 95% CIs | [18]       |
| Brattstrom D et al, 2005 | Newly developed assay measuring cytokeratins 8, 18 and 19 in serum is correlated to survival and tumor volume in patients with esophageal carcinoma                                    | without survival data to estimate HRs and 95% CIs | [19]       |
| Ito H et al, 2004        | Detection and quantification of circulating tumor cells in patients with esophageal cancer by real-time polymerase chain reaction                                                      | without survival data to estimate HRs and 95% CIs | [20]       |
| Nakashima S et al, 2003  | Clinical significance of circulating tumor cells in blood by molecular detection and tumor markers in esophageal cancer                                                                | without survival data to estimate HRs and 95% CIs | [21]       |
| Geng Q et al, 2010       | Detection and quantification of circulating tumor cells in esophageal squamous cancer by real-time fluorescent quantitative reverse transcriptase-polymerase chain reaction            | without survival data to estimate HRs and 95% CIs | [22]       |
| Liu Z et al, 2007        | Circulating tumor cells in perioperative esophageal cancer patients: quantitative assay system and potential clinical utility                                                          | without survival data to estimate HRs and 95% CIs | [23]       |
| Bobek V et al, 2014      | Cultivation of circulating tumor cells in esophageal cancer                                                                                                                            | without survival data to estimate HRs and 95% CIs | [24]       |
| Sclafani F et al, 2014   | A pilot study assessing the incidence and clinical significance of circulating tumor cells in esophagogastric cancers                                                                  | less than 20 samples                              | [25]       |
| Ren C et al, 2011        | Malignant characteristics of circulating tumor cells and corresponding primary tumor in a patient with esophageal squamous cell carcinoma before and after surgery                     | less than 20 samples                              | [26]       |
| Fujii K et al, 2010      | Primary malignant melanoma of the esophagus--detection of circulating tumor cells                                                                                                      | less than 20 samples                              | [27]       |
| Reeh M et al, 2015       | Circulating Tumor Cells as a Biomarker for Preoperative Prognostic Staging in Patients With Esophageal Cancer.                                                                         | without survival data to estimate HRs and 95% CIs | [32]       |
| Tanaka M et al, 2015     | Prognostic significance of circulating tumor cells in patients with advanced esophageal cancer                                                                                         | without survival data to estimate HRs and 95% CIs | [1]        |
